# Supplementary material for: Postoperative malocclusion after maxillofacial fracture management: a retrospective case study
Source: Maxillofac Plast Reconstr Surg. 2018 Oct 15;40(1):27. doi: 10.1186/s40902-018-0167-z (PMC6186531; doi:10.1186/s40902-018-0167-z)
Supplement: Supplementary file 1 — Case form and result of data. (XLSX 10 kb) [file 40902_2018_167_MOESM1_ESM.xlsx]

## Sheet: Sheet1
	chart no.	sex	age(y)	initial visiting day	fractured site	first op (at PS)	post-op complications	dental treatment
1	24112132	f	29	2014-12-19	Mx	ORIF	severe openbite (malocclusion), TMD	re-op (orthognathic sur.)
2	18846214	m	54	2017-01-20	Mn(body)	ORIF	bone necrosis, tooth loss	reconsturction using iliac bone graft, implantation
3	25859814	f	41	2016-04-28	Mn(body+ramus)	ORIF	tooth fracture, mobility, pulp necrosis, LOM, TMD	extraction, endodontic&prosthodontic tx, TMD tx.
4	25911907	m	24	2016-04-14	Mn(ramus)	ORIF	tooth fracture, toothache etc. (tooth problem)	extraction, endodontic&prosthodontic tx
5	25868197	m	18	2016-02-15	panfacial	ORIF	tooth avulsion, luxation, alveolar bone fracture, malocclusion	extraction, endodontic&prosthodontic tx, TMD tx.
6	24447939	f	37	2015-03-24	Mx+Mn(body+condyle)	ORIF	condyle displacement, #16-21 tooth loss, alveolar bone fracture, LOM	extraction, endodontic&prosthodontic tx, TMD tx.
7	23364675	m	53	2014-05-15	Mn(body+condyle)	ORIF	malocclusion, tooth fracture	extraction, endodontic&prosthodontic tx, TMD tx.
8	23237401	m	53	2014-04-11	Mn(ramus)	ORIF	malocclusion, TMD, osteomyelitis	TMD tx.
9	24624642	f	56	2015-04-14	Mn(body+both condyle)	ORIF	tooth fracture, both fractured condyle displacement	extraction, endodontic&prosthodontic tx, TMD tx.
